# Supplementary material for: The Expression of Adipogenic Marker Is Significantly Increased in Estrogen-Treated Lipedema Adipocytes Differentiated from Adipose Stem Cells In Vitro
Source: MDPI journal article supplement (doi:10.3390/biomedicines12051042), 2024-05-09
Supplement: s1 [file s1]

## Supplementary material

# The Expression of Adipogenic Marker Is Significantly Increased in Estrogen-Treated Lipedema Adipocytes Differentiated from Adipose Stem Cells In Vitro

Sara Al-Ghadban <sup>1,\*</sup>, Spencer U. Isern <sup>1</sup>, Karen L. Herbst <sup>2</sup> and Bruce A. Bunnell <sup>1,\*</sup>

<sup>1</sup> Department of Microbiology, Immunology and Genetics, University of North Texas Health Science Center, Fort Worth, TX 76107, USA; spencer.isern@unthsc.edu

<sup>2</sup> Total Lipedema Care, Tucson, AZ 85715, USA; kaherbst@gmail.com

\* Correspondence: sara.al-ghadban@unthsc.edu (S.A.-G.); bruce.bunnell@unthsc.edu (B.A.B.)

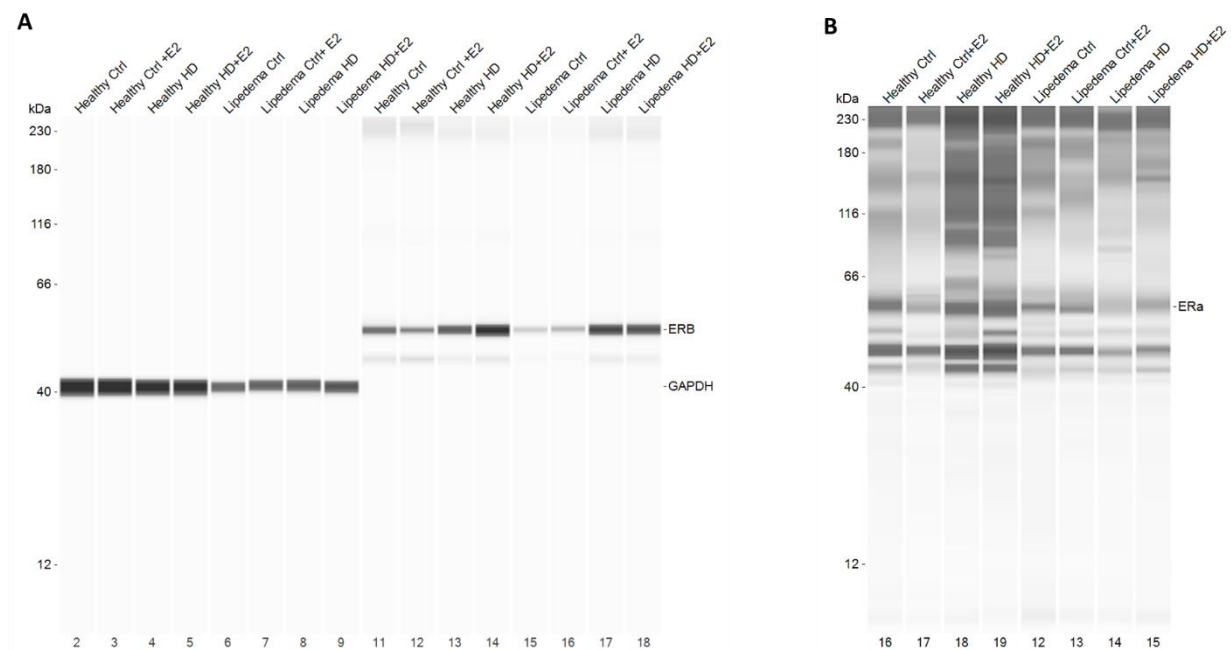

**Figure S1.** Western Blot showing the expression of (A) GAPDH (capillaries 2-9) and ERβ (capillaries 11-18) and (B) ERα in healthy and lipedema ASCs in 2D monolayer culture. The samples were run on a 12-230 kDa capillary kit.

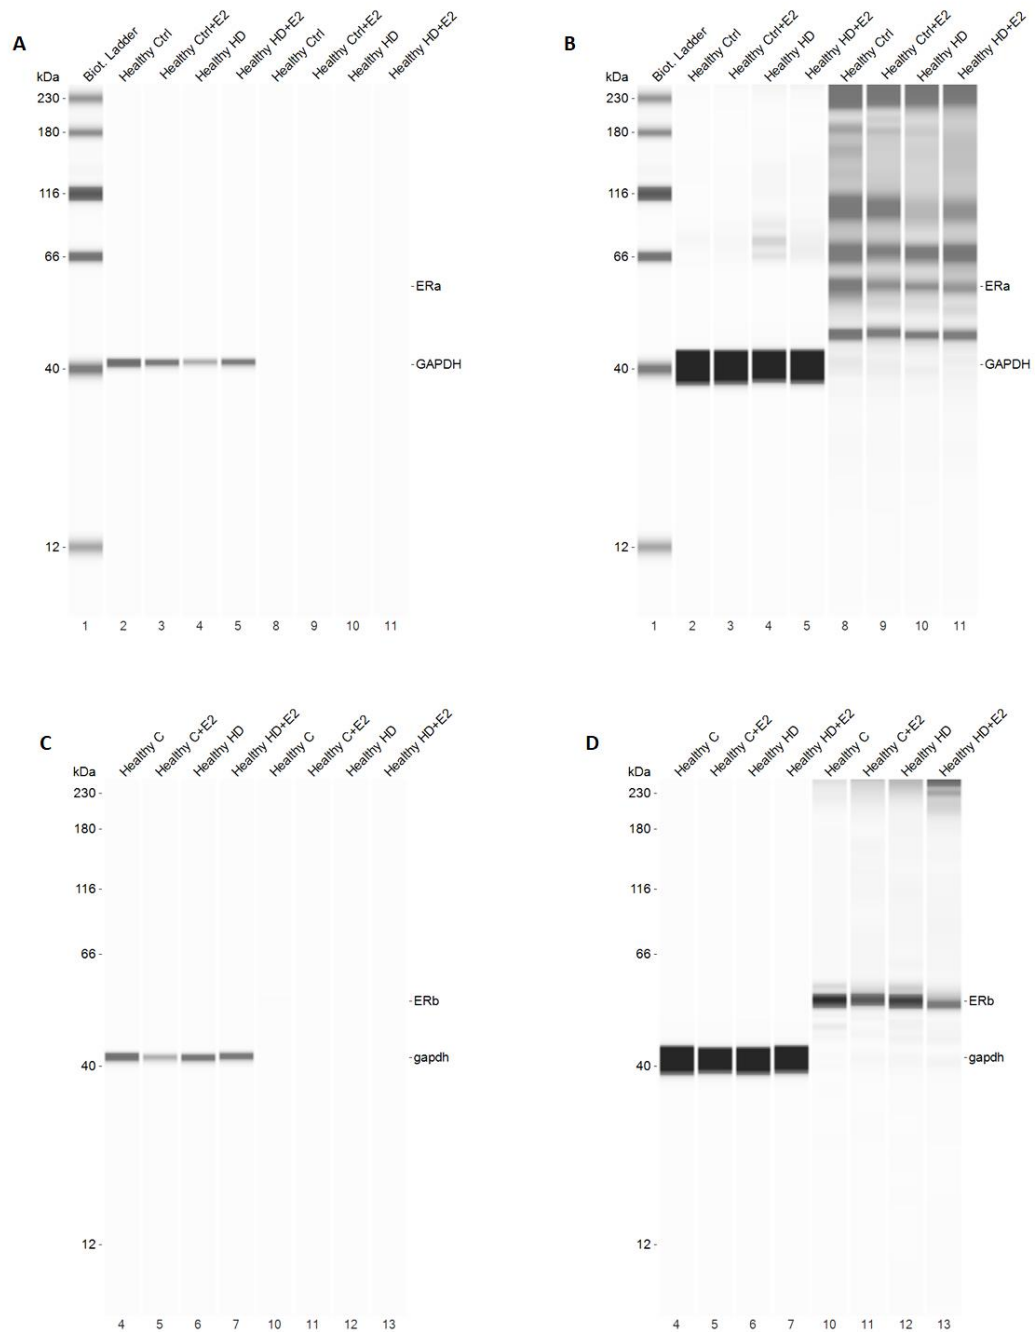

**Figure S2.** Western Blot showing the expression of (A, B) ER $\alpha$  and GAPDH and (C, D) ER $\beta$  and GAPDH in healthy spheroids. The samples were run on a 12-230 kDa capillary kit. A-B, and C-D are different exposures of the same run.

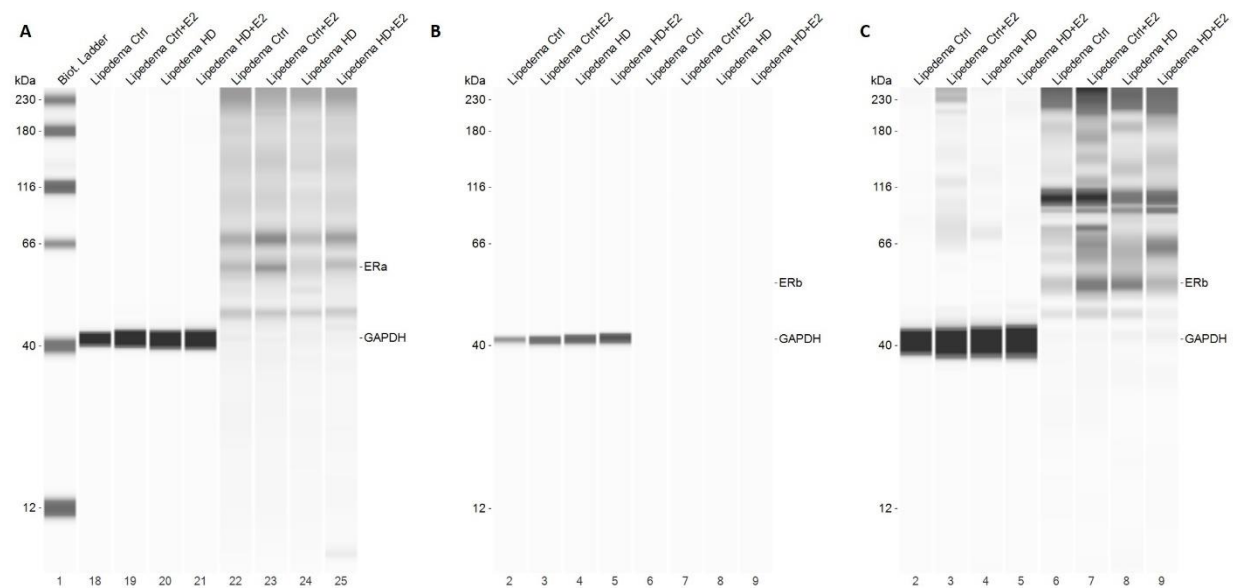

**Figure S3.** Western Blot showing the expression of (A) ER $\alpha$  and GAPDH and (B, C) ER $\beta$  and GAPDH in lipedema spheroids. The samples were run on a 12-230 kDa capillary kit. B,C are different exposures of the same run.

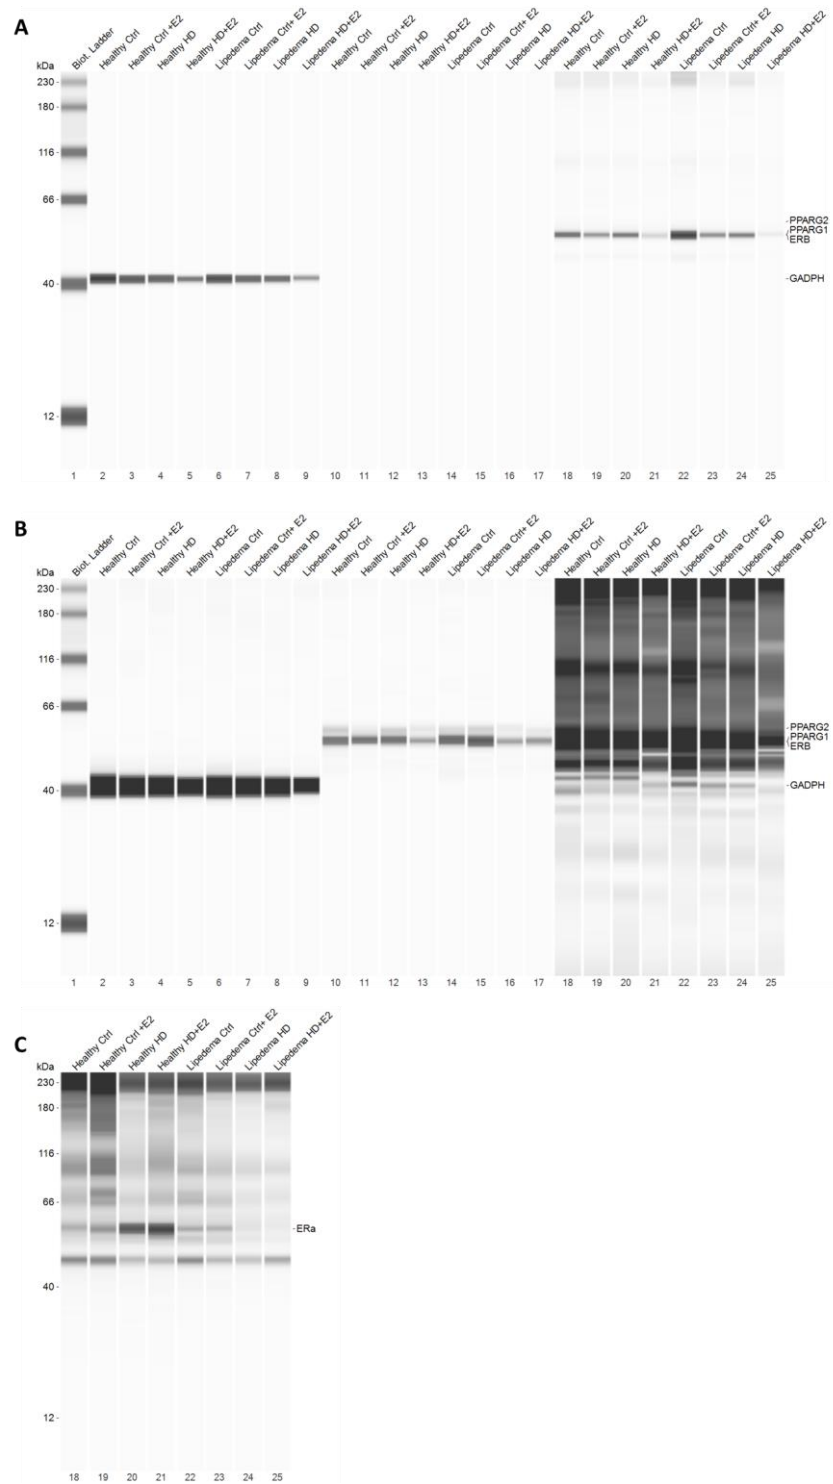

**Figure S4.** A, B. Western Blot showing the expression of GAPDH (capillaries 2-9), total PPARγ (capillaries 10-17), ERβ (capillaries 18-25), and C. Western Blot showing the expression of ERα in healthy and lipedema adipocytes in 2D monolayer cultures. The samples were run on a 12-230 kDa capillary kit. A-B are different exposures of the same run.

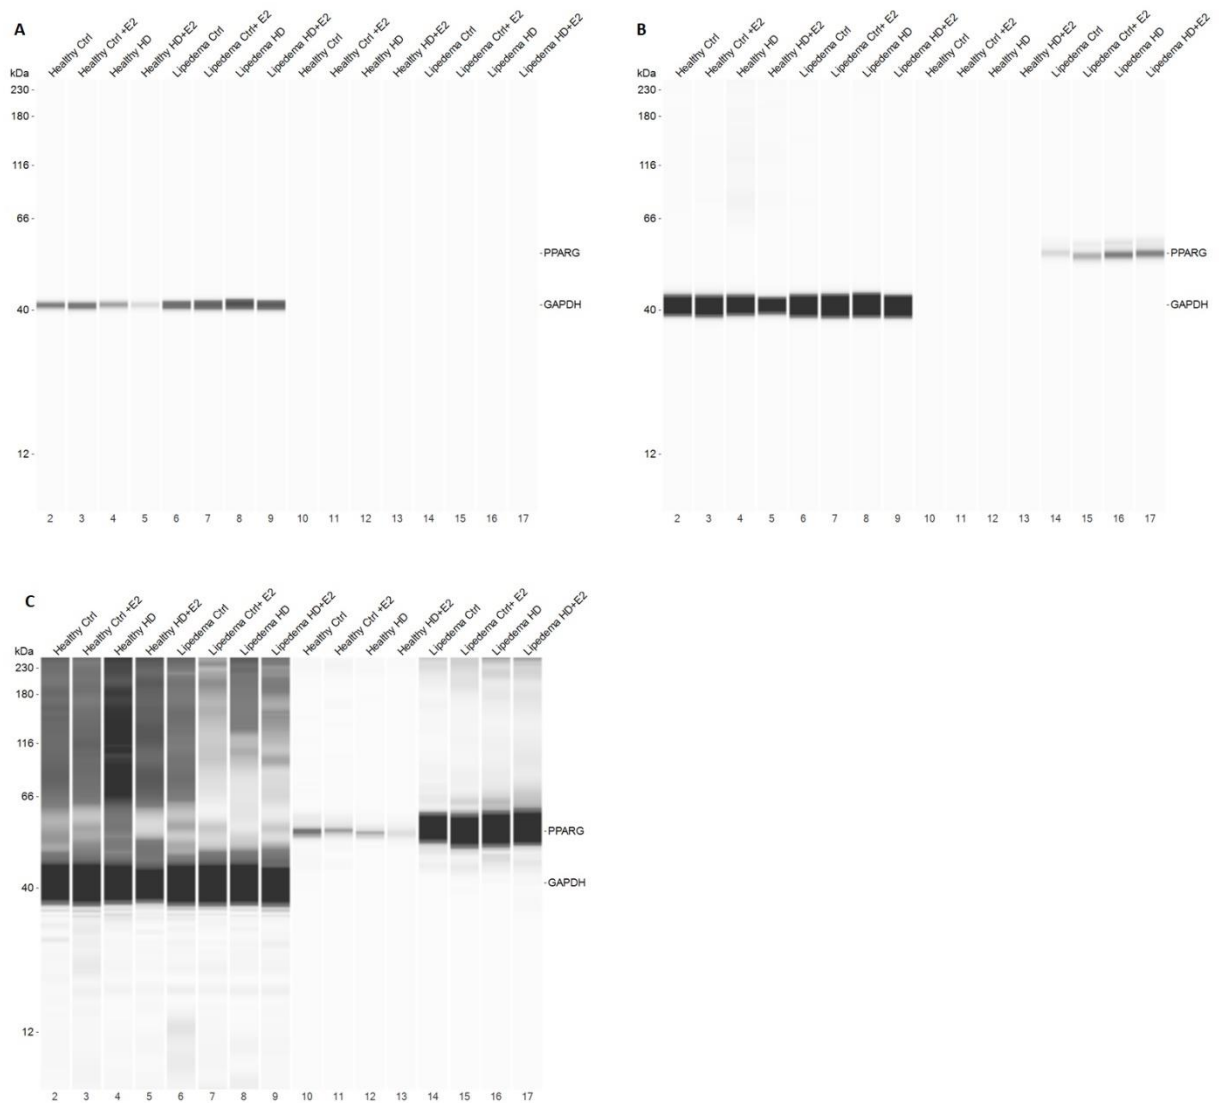

**Figure S5.** Western Blot showing the expression of GAPDH (capillaries 2-9), and total PPAR $\gamma$  (capillaries 10-17) in adipogenic differentiated spheroids. The samples were run on a 12-230 kDa capillary kit. A-C are different exposures of the same run

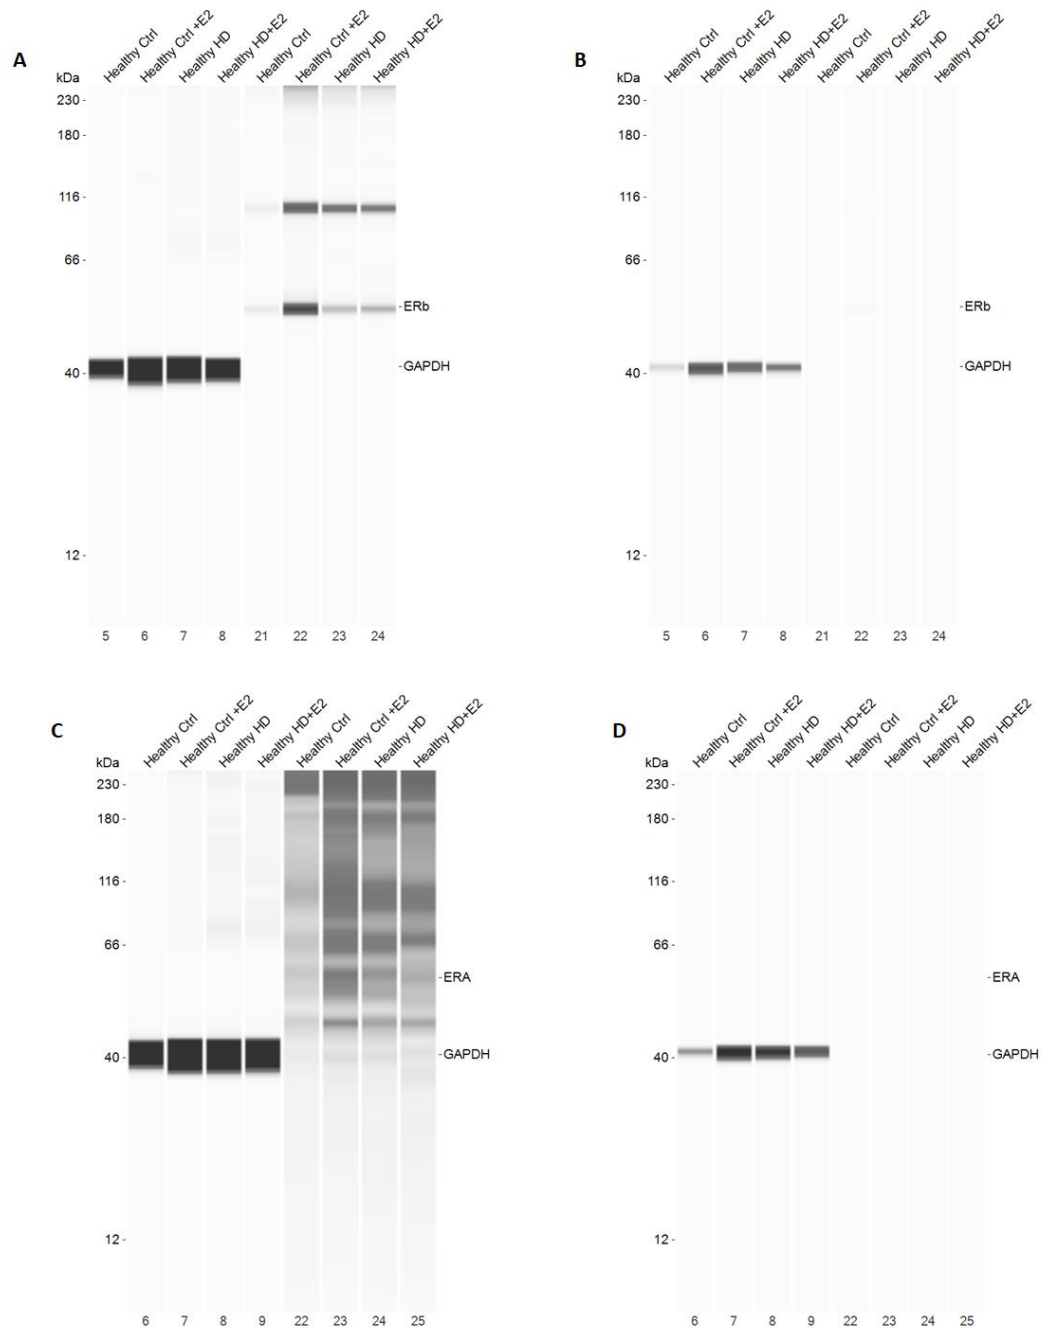

**Figure S6.** Western Blot showing the expression of (A, B) ER $\beta$  and GAPDH and (C, D) ER $\alpha$  and GAPDH in adipogenic differentiated healthy spheroids. The samples were run on a 12-230 kDa capillary kit. A-B, C-D are different exposures of the same run.

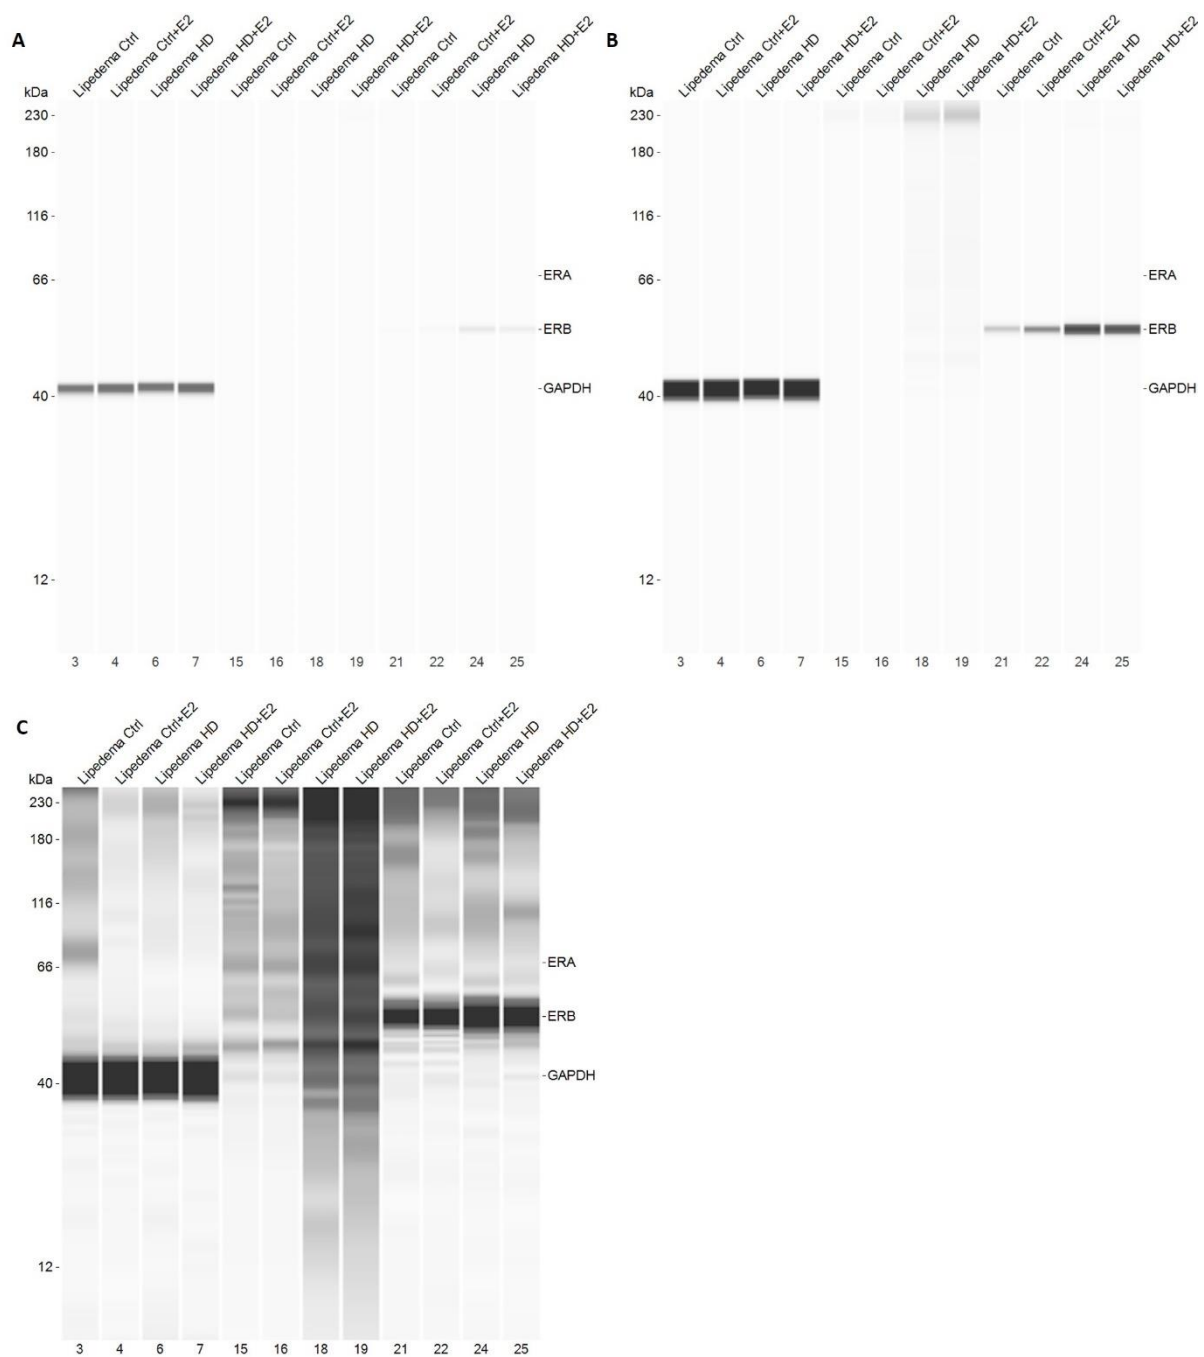

**Figure S7.** Western Blot showing the expression of GAPDH, ER $\alpha$  and ER $\beta$  in adipogenic differentiated lipedema spheroids. The samples were run on a 12-230 kDa capillary kit. A-C are different exposures of the same run.

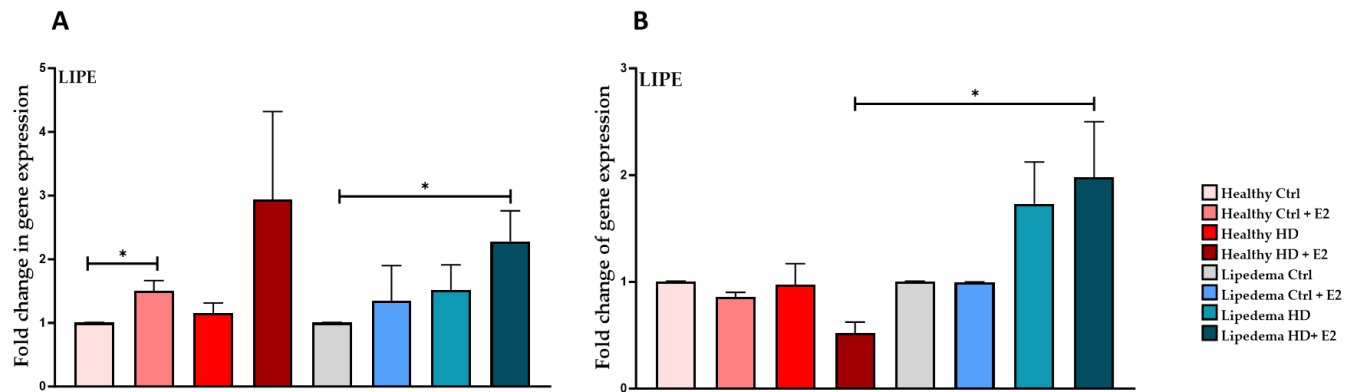

**Figure S8.** RT-PCR showed increased expression of LIPE in E2-HD lipedema treated (A) adipocytes in 2D culture and (B) differentiated spheroids compared to untreated control cells (n=3, \*p<0.05).
